# Supplementary material
Source: Springer Nature journal article supplement (http://www.springermedizin.de/resource/supplementary/12943_2013_1171_MOESM1_ESM.pdf/9552248)

A

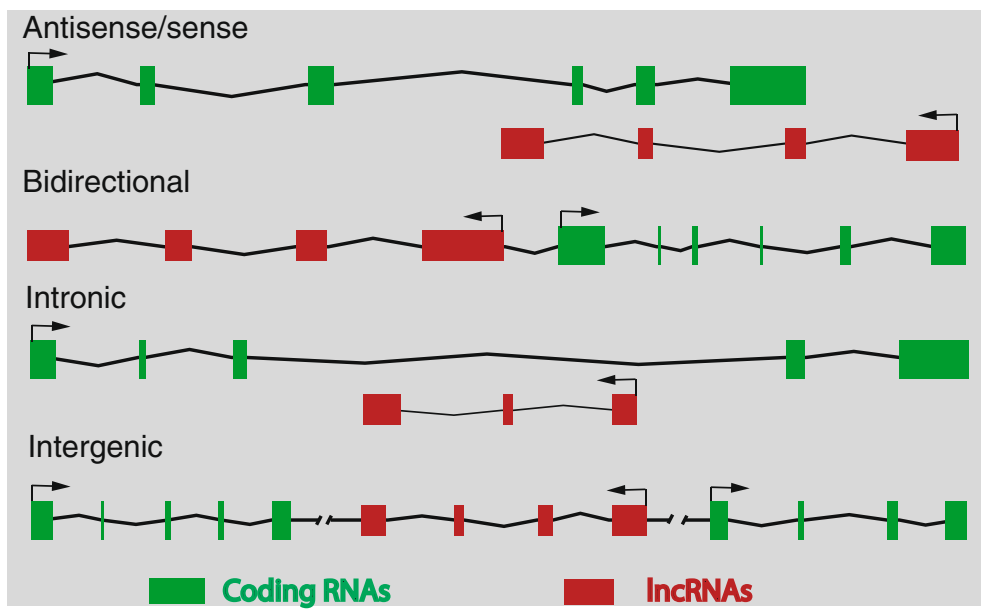

B

## Chromatin remodeling

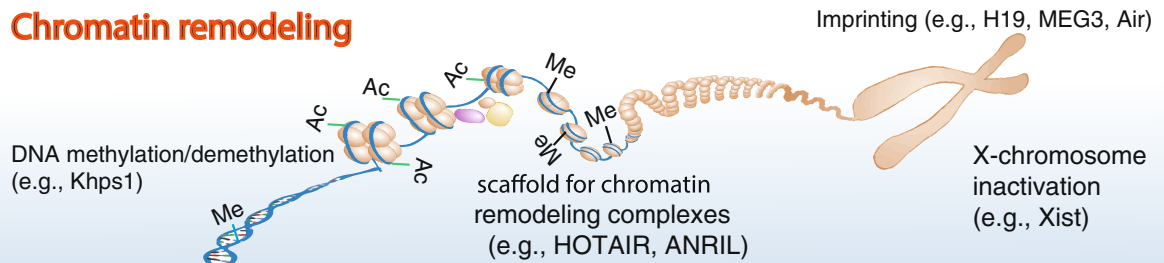

## Transcriptional regulation

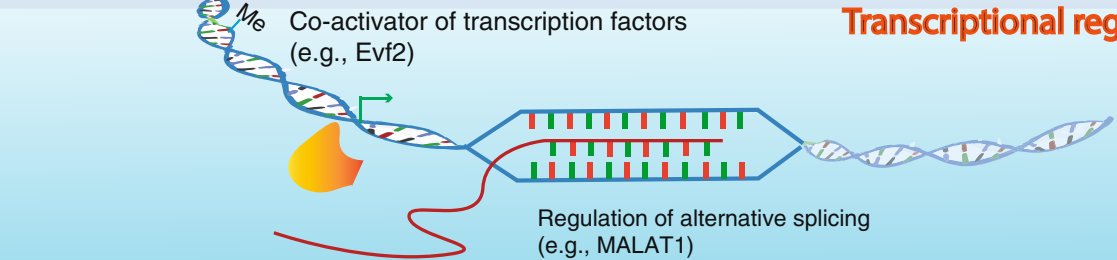

## Posttranscriptional processing

mRNA stabilization/destabilization (e.g., BACE1-AS)

Protein stability (e.g., HOTTIP)

Protein activity (e.g., CCND1 ncRNA)

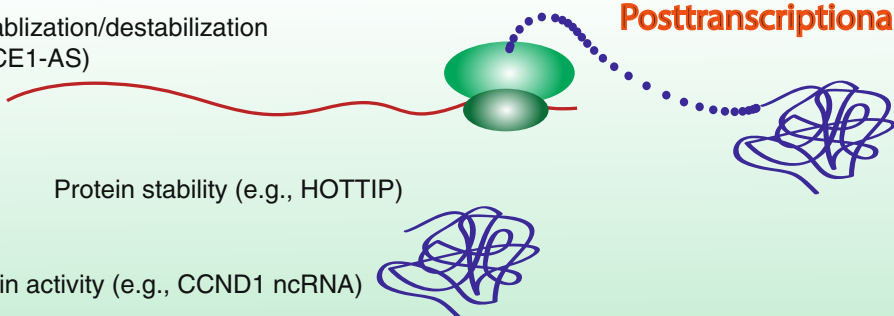

Supplement: MOESM1 [file 9552248]
